# Supplementary material for: Facile preparation of a cationic COF functionalized magnetic nanoparticle and its use for the determination of nine hydroxylated polycyclic aromatic hydrocarbons in smokers’ urine
Source: Royal Society of Chemistry journal article supplement (doi:10.1039/c9an01188a), 2019-01-01
Supplement: c9an01188a1.pdf [file c9an01188a1.pdf]

## Supporting Information

### Facile preparation of a cationic COF functionalized magnetic nanoparticle and used for the determination of nine hydroxylated polycyclic aromatic hydrocarbons in smokers' urine

Wenfen Zhang <sup>a,††</sup>, Yanhao Zhang <sup>b†</sup>, Guangrui Zhang <sup>a</sup>, Jiyang Liu <sup>a</sup>, Wuduo Zhao <sup>\*c</sup>, Wenjing Zhang <sup>a</sup>, Kai Hu <sup>d</sup>, Fuwei Xie <sup>e</sup>, Shusheng Zhang <sup>a\*</sup>

<sup>a</sup>. College of Chemistry and Molecular Engineering, Zhengzhou University, Kexue Avenue 100, Zhengzhou, Henan 450001, P. R. China.

<sup>b</sup>. State Key Laboratory of Environmental and Biological Analysis, Department of Chemistry, Hong Kong Baptist University, Hong Kong, 999077

<sup>c</sup>. Center of Advanced Analysis and Computational Science, Key Laboratory of Molecular Sensing and Harmful Substances Detection Technology, Zhengzhou University, Kexue Avenue 100, Zhengzhou, Henan 450001, P. R. China.

<sup>d</sup>. Henan University of Traditional Chinese Medicine, Zhengzhou, Henan 450001, P. R. China.

<sup>e</sup>. Zhengzhou Tobacco Research Institute of CNTC, Fengyang Street 2, Zhengzhou, Henan 450001, P. R. China.

†. These authors contribute equally and should be considered co-first authors.

**\*Corresponding authors at:**

*Shusheng Zhang:* Email: [zsszz@126.com](mailto:zsszz@126.com), Telephone number: +8613513801442, Fax: +860 371 67763224.

*Wuduo Zhao:* Email: [zhaowuduo@163.com](mailto:zhaowuduo@163.com), Telephone number: +8613607675532, Fax: +86 0371 67763224.

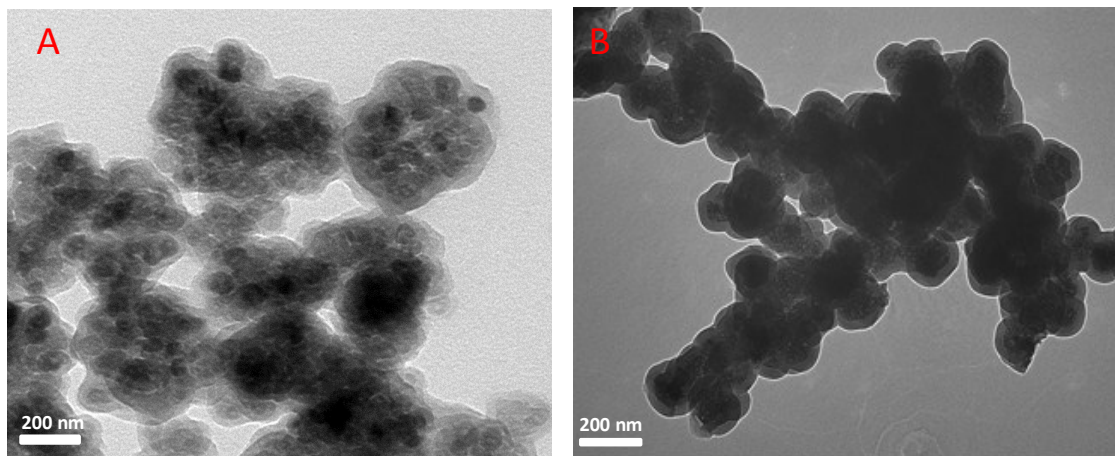

Fig. S1 The TEM of  $\text{Fe}_3\text{O}_4@\text{SiO}_2$  prepared using different amount of TEOS: A, 1mL TEOS; B, 2mL TEOS

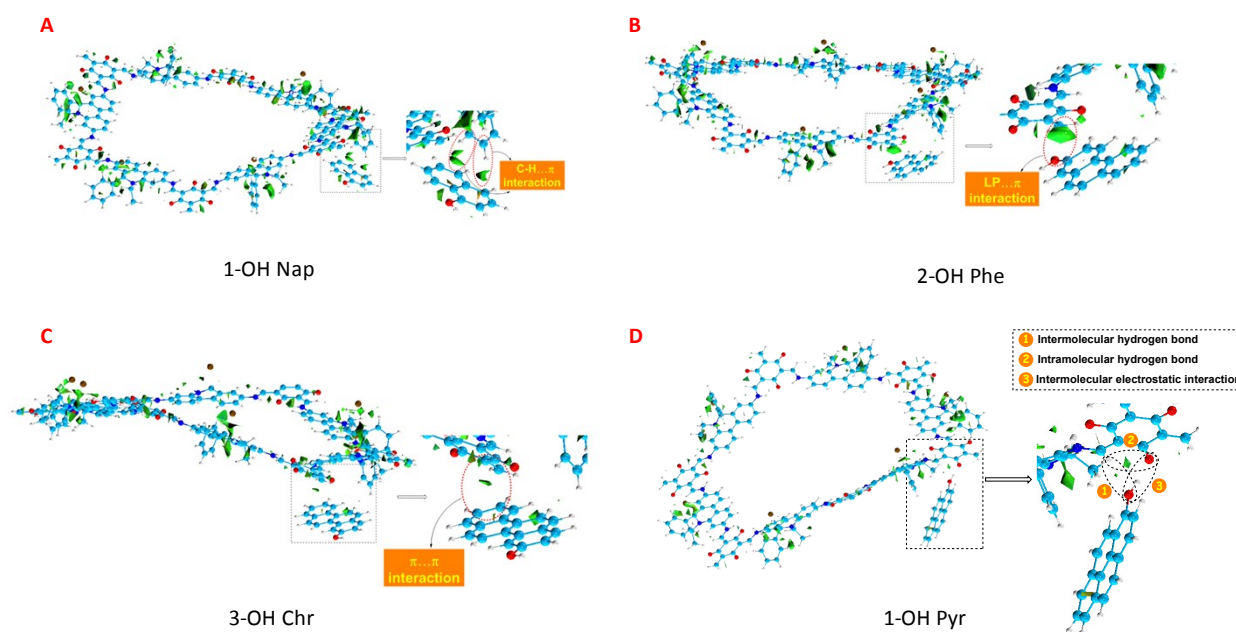

Fig. S2 The representation non-covalent interaction simulation between EB COF and OH-PAHs.

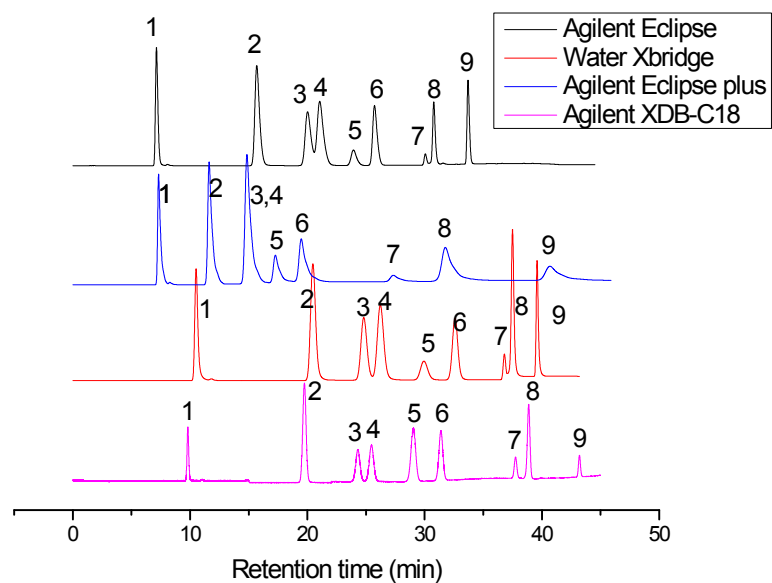

Fig. S3 The chromatogram of 9 OH-PAHs based on different column. Peaks: 1, 1-OH Nap; 2, 2-OH Flu; 3, 2-OH Phe; 4, 3-OH Phe; 5, 9-OH Phe; 6, 4-OH Phe; 7, 3-OH FA; 8, 1-OH Pyr; 9, 3-OH Chr.

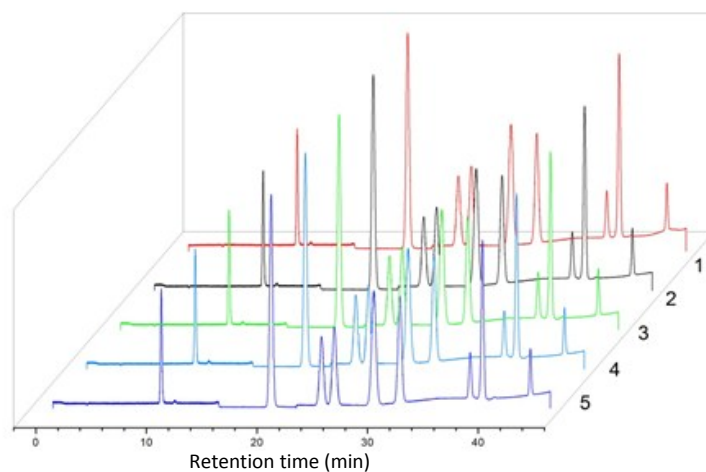

Fig. S4 The stability of the established separation method

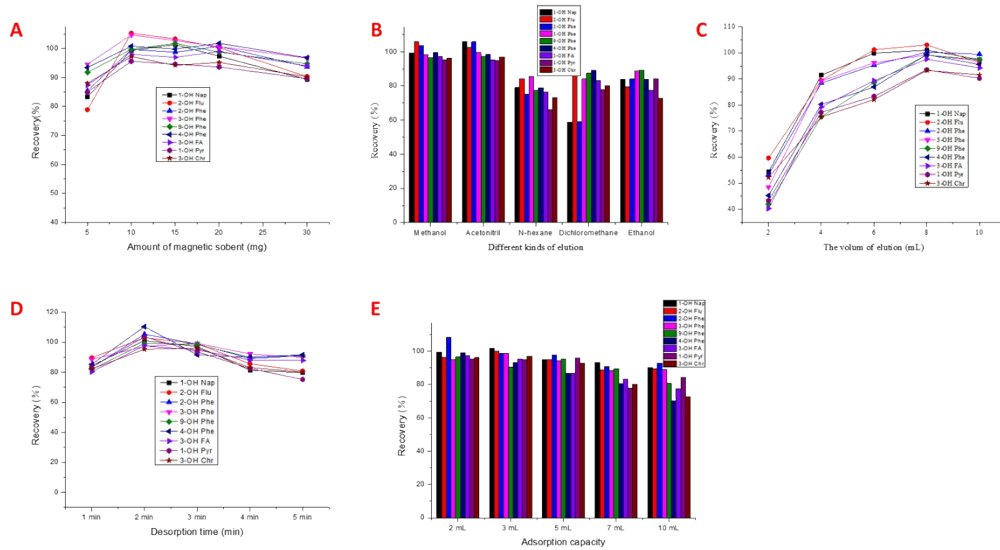

Fig. S5 Effect of experimental parameters on the MSPE efficiency of OH-PAHs (A, Amount of magnetic sorbent vs recovery; B, The kinds of elution vs recovery; C, The volume of elution vs recovery; D, Desorption time vs recovery; E, Adsorption capacity vs recovery)

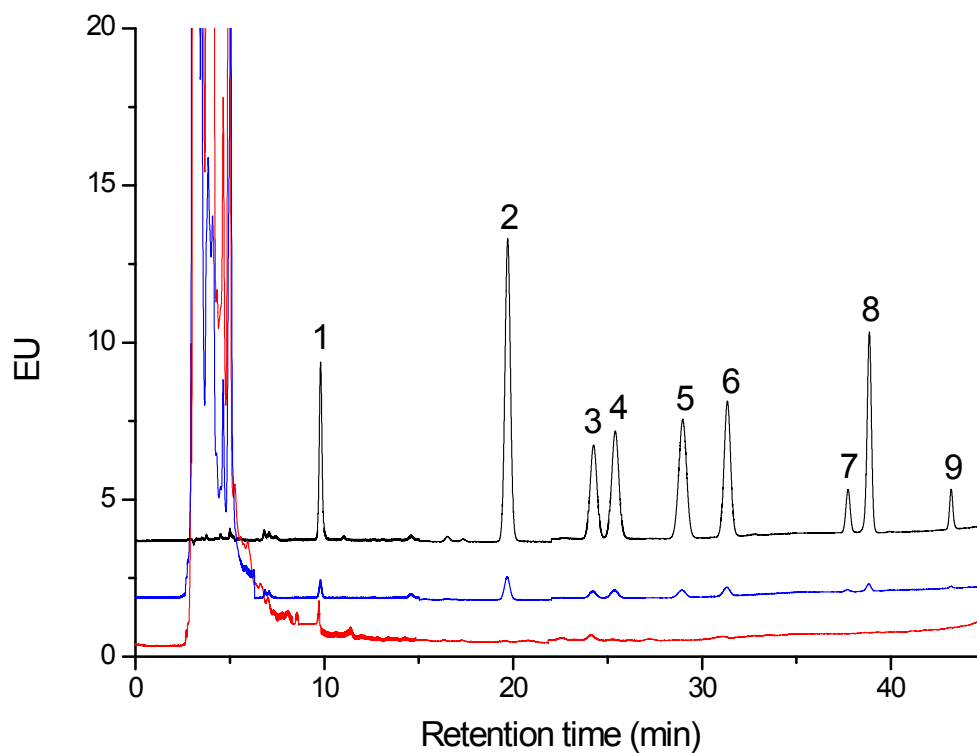

Fig. S6 Typical chromatograms of OH-PAHs in the urine samples of the smokers. Peaks: 1, 1-OH Nap; 2, 2-OH Flu; 3, 2-OH Phe; 4, 3-OH Phe; 5, 9-OH Phe; 6, 4-OH Phe; 7, 3-OH FA; 8, 1-OH Pyr; 9, 3-OH Chr.

Table S1 The information of the volunteers participating in this projects

| Smokers       | height | weight | heartrate | age | cigarettes/day | Smoke age |
|---------------|--------|--------|-----------|-----|----------------|-----------|
| Low Tar level |        |        |           |     |                |           |
| 1             | 163.5  | 63.0   | 76        | 54  | 10             | 18        |
| 2             | 176.0  | 67.0   | 72        | 22  | 10             | 2         |
| 3             | 164.0  | 87.0   | 76        | 23  | 10             | 2         |
| 4             | 165.0  | 60.0   | 98        | 58  | 15             | 30        |
| 5             | 170.0  | 61.0   | 85        | 30  | 20             | 14        |
| 6             | 158.5  | 57.0   | 90        | 38  | 15             | 8         |
| 7             | 158.5  | 69.0   | 76        | 47  | 15             | 27        |
| 8             | 170.0  | 51.0   | 85        | 26  | 15             | 9         |
| 9             | 174.5  | 66.0   | 78        | 47  | 20             | 31        |
| 10            | 170.0  | 61.0   | 71        | 50  | 12             | 28        |
| 11            | 163.5  | 57.0   | 73        | 41  | 20             | 21        |
| 12            | 172.0  | 75.0   | 81        | 30  | 10             | 21        |

|                  |       |       |     |    |    |        |
|------------------|-------|-------|-----|----|----|--------|
| 13               | 167.0 | 74.0  | 88  | 22 | 10 | 10     |
| 14               | 166.0 | 56.0  | 85  | 26 | 10 | 4      |
| 15               | 174.0 | 67.0  | 80  | 51 | 17 | 30     |
| 16               | 160.0 | 60.0  | 85  | 48 | 15 | 28     |
| 17               | 171.5 | 81.0  | 80  | 51 | 15 | 34     |
| 18               | 170.0 | 65.0  | 78  | 42 | 20 | 15     |
| 19               | 164.0 | 87.0  | 107 | 36 | 17 | 20     |
| 20               | 163.5 | 63.0  | 76  | 54 | 10 | 18     |
| Medium Tar level |       |       |     |    |    |        |
| 21               | 160.5 | 62.0  | 100 | 45 | 13 | 25     |
| 22               | 163.5 | 53.0  | 70  | 25 | 10 | 8      |
| 23               | 170.0 | 72.0  | 96  | 44 | 14 | Unknow |
| 24               | 171.0 | 72.0  | 90  | 48 | 18 | 29     |
| 25               | 160.0 | 40.0  | 84  | 51 | 10 | 39     |
| 26               | 173.0 | 54.0  | 82  | 43 | 10 | 26     |
| 27               | 164.0 | 65.5  | 80  | 50 | 10 | 17     |
| 28               | 163.0 | 74.5  | 88  | 42 | 10 | 24     |
| 29               | 158.0 | 52.0  | 93  | 58 | 12 | 22     |
| 30               | 164.0 | 50.6  | 88  | 54 | 15 | 25     |
| 31               | 162.5 | 59.5  | 90  | 27 | 20 | 7      |
| 32               | 165.7 | 64.5  | 83  | 43 | 20 | 27     |
| 33               | 162.0 | 74.0  | 88  | 46 | 20 | 24     |
| 34               | 153.0 | 54.0  | 78  | 53 | 20 | 33     |
| 35               | 170.0 | 61.0  | 84  | 42 | 10 | 8      |
| 36               | 179.0 | 76.0  | 76  | 32 | 10 | 18     |
| 37               | 173.0 | 64.0  | 90  | 33 | 10 | 21     |
| 38               | 172.0 | 81.0  | 84  | 58 | 20 | 40     |
| 39               | 164.0 | 60.0  | 86  | 60 | 20 | 41     |
| 40               | 182.0 | 60.0  | 90  | 19 | 20 | 3      |
| High Tar level   |       |       |     |    |    |        |
| 41               | 171.0 | 72.0  | 98  | 22 | 15 | 5      |
| 42               | 175.0 | 105.0 | 86  | 31 | 20 | 18     |
| 43               | 166.0 | 60.0  | 68  | 44 | 15 | 22     |
| 44               | 163.0 | 63.5  | 81  | 25 | 14 | 11     |
| 45               | 169.0 | 64.0  | 78  | 57 | 15 | 34     |
| 46               | 164.5 | 62.5  | 74  | 64 | 14 | 36     |
| 47               | 159.0 | 69.0  | 84  | 51 | 40 | 35     |
| 48               | 164.0 | 63.0  | 82  | 65 | 15 | 38     |
| 49               | 163.0 | 66.0  | 82  | 50 | 10 | 30     |
| 50               | 162.0 | 59.0  | 86  | 57 | 20 | 30     |
| 51               | 164.0 | 63.0  | 88  | 37 | 15 | 18     |
| 52               | 174.0 | 71.0  | 82  | 22 | 20 | 5      |
| 53               | 156.5 | 61.5  | 72  | 61 | 10 | 37     |
| 54               | 181.0 | 96.5  | 86  | 26 | 25 | 12     |
| 55               | 161.0 | 60.5  | 70  | 58 | 20 | 44     |

|             |       |      |     |    |    |    |
|-------------|-------|------|-----|----|----|----|
| 56          | 180.0 | 72.0 | 85  | 49 | 20 | 31 |
| 57          | 182.0 | 75.0 | 78  | 22 | 15 | 1  |
| 58          | 178.0 | 72.0 | 80  | 51 | 10 | 30 |
| 59          | 165.0 | 61.0 | 96  | 26 | 20 | 15 |
| 60          | 156.5 | 67.5 | 103 | 49 | 16 | 23 |
| Non-smokers |       |      |     |    |    |    |
| 61          | 159.0 | 69.0 | 65  | 31 | -- | -- |
| 62          | 171.5 | 74.0 | 64  | 56 | -- | -- |
| 63          | 172.0 | 68.0 | 74  | 42 | -- | -- |
| 64          | 170.0 | 75.5 | 66  | 23 | -- | -- |
| 65          | 169.0 | 64.0 | 60  | 27 | -- | -- |
| 66          | 173.0 | 75.0 | 82  | 37 | -- | -- |
| 67          | 153.0 | 53.0 | 76  | 46 | -- | -- |
| 68          | 162.5 | 52.0 | 72  | 58 | -- | -- |
| 69          | 163.0 | 63.0 | 78  | 42 | -- | -- |
| 70          | 174.0 | 78.0 | 69  | 41 | -- | -- |
| 71          | 174.5 | 55.0 | 96  | 32 | -- | -- |
| 72          | 166.0 | 69.5 | 60  | 60 | -- | -- |
| 73          | 178.0 | 76.5 | 68  | 27 | -- | -- |
| 74          | 162.0 | 56.0 | 81  | 26 | -- | -- |
| 75          | 162.6 | 70.5 | 83  | 32 | -- | -- |
| 76          | 164.0 | 68.0 | 78  | 52 | -- | -- |
| 77          | 160.0 | 58.0 | 83  | 58 | -- | -- |
| 78          | 166.0 | 56.5 | 85  | 26 | -- | -- |
| 79          | 168.0 | 54.5 | 71  | 47 | -- | -- |
| 80          | 156.0 | 55.0 | 72  | 55 | -- | -- |

Table S2 Calibration curves in matrix and pure solvent

| Probes   | Calibrations in matrix | R <sup>2</sup> | Calibrations in pure solvent | R <sup>2</sup> | slope ratios |
|----------|------------------------|----------------|------------------------------|----------------|--------------|
| 1-OH NA  | $y = 34714x + 49162$   | 0.9965         | $y = 35872x + 34840$         | 0.9998         | 0.9677       |
| 2-OH FLU | $y = 126667x + 98304$  | 0.9996         | $y = 113920x + 89807$        | 0.9996         | 1.112        |
| 2-OH PHE | $y = 51158x + 43213$   | 0.9992         | $y = 53813x + 53651$         | 0.9999         | 0.9507       |
| 3-OH PHE | $y = 61671x + 39215$   | 0.9993         | $y = 65309x + 11448$         | 0.9997         | 0.9443       |
| 9-OH PHE | $y = 85615x - 28025$   | 0.9999         | $y = 90319x + 31451$         | 0.9998         | 0.9479       |
| 4-OH PHE | $y = 71958x + 8865.5$  | 0.9998         | $y = 69329x + 7228$          | 0.9997         | 1.038        |
| 3-OH FA  | $y = 16828x - 13810$   | 0.9995         | $y = 15814x - 13160$         | 0.9994         | 1.064        |
| 1-OH P   | $y = 63008x + 19637$   | 0.9998         | $y = 66307x + 19932$         | 0.9990         | 0.9502       |
| 3-OH CHR | $y = 14629x - 7263.1$  | 0.9995         | $y = 13546x + 9246$          | 0.9997         | 1.080        |
